# Supplementary material
Source: publisher figshare collection journal article supplement (https://frontiersin.figshare.com/ndownloader/files/30977605)
Supplement: Supplementary file 1 [file 30977605]

Supplementary Table 1. Amphipoda family composition at Steinahóll vent fields. *: hydrothermally influenced sample.

| gear | **ROV** | | | | | | | | | | | | | | |  | **EBS** | | | | | | |  | **vV** | | | | | |  |  |
| --- | --- | --- | --- | --- | --- | --- | --- | --- | --- | --- | --- | --- | --- | --- | --- | --- | --- | --- | --- | --- | --- | --- | --- | --- | --- | --- | --- | --- | --- | --- | --- | --- |
| station / sample | 4 / 1 | 4 / 2* | 4 / 5 | 4 / 6* | 212 / 2* | 212 / 3* | 212 / 4* | 212 / 5* | 213 / 1* | 213 / 3 | 228 / 1* | 228 / 2 | 228 / 5* | 228 / 6 | 228 / 7 |  | 7 | 9 | 18 | 216 | 219 | 223 | 225 |  | 8 | 17 | 215 | 217 | 222 | 224 |  | Total |
| **Amphilochidea** |  |  |  |  |  |  |  |  |  |  |  |  |  |  |  |  |  |  |  |  |  |  |  |  |  |  |  |  |  |  |  |  |
| Acanthonotozomatidae | - | - | - | - | - | - | - | - | - | - | - | - | - | - | - |  | - | - | - | - | - | - | 1 |  | - | - | - | - | - | - |  | **1** |
| Amphilochidae | 1 | 17 | - | - | - | - | - | - | - | - | - | 1 | 3 | - | 4 |  | 30 | 1 | 1 | 2 | - | 1 | 7 |  | - | - | - | - | - | - |  | **68** |
| Cressidae | - | - | - | - | - | - | - | - | - | - | - | - | - | - | - |  | 1 | - | - | - | - | - | - |  | - | - | - | - | - | - |  | **1** |
| Cyproideidae | - | - | - | - | - | - | - | - | - | 2 | - | - | - | - | - |  | 3 | 1 | - | - | - | - | - |  | - | - | - | - | - | - |  | **6** |
| Epimeriidae | - | - | - | - | - | - | - | - | - | - | - | - | - | - | - |  | - | - | - | - | - | - | 1 |  | - | - | - | - | - | - |  | **1** |
| Leucothoidae | - | - | - | - | - | - | - | - | - | - | - | - | - | - | - |  | 3 | - | - | - | - | - | - |  | - | - | - | - | - | - |  | **3** |
| Pleustidae | 34 | - | - | - | - | 1 | - | - | - | - | - | - | - | - | - |  | - | - | - | - | - | - | - |  | - | - | - | - | - | - |  | **35** |
| Sicafodiidae | - | - | - | - | - | - | - | - | - | - | - | - | - | - | - |  | - | - | - | - | - | - | - |  | - | - | 1 | - | - | - |  | **1** |
| Stenothoidae | 1 | 46 | 10 | - | - | 2 | 3 | 6 | 21 | 1 | - | 2 | 20 | - | - |  | - | - | - | - | - | - | - |  | - | - | - | - | - | - |  | **112** |
| Stilipedidae | - | - | - | - | - | - | - | - | - | - | - | - | - | - | - |  | 2 | - | - | - | - | - | 2 |  | - | - | - | - | - | - |  | **4** |
| Eusiridae | - | - | - | - | - | - | - | - | - | - | - | - | - | - | - |  | - | - | - | - | - | - | 3 |  | - | - | - | - | - | - |  | **3** |
| Liljeborgiidae | - | - | - | - | - | - | - | - | - | - | - | - | - | - | - |  | - | - | - | 1 | - | - | 2 |  | - | 1 | - | - | 1 | - |  | **5** |
| Oedicerotidae | - | - | - | - | - | - | - | - | - | 1 | - | - | - | - | - |  | 5 | - | - | 1 | - | - | 32 |  | - | - | - | - | - | - |  | **39** |
| Phoxocephalidae | - | - | - | - | - | - | - | - | - | 1 | - | 1 | - | - | - |  | 13 | - | - | - | - | - | - |  | - | - | 1 | - | 2 | 1 |  | **19** |
| Lysianassidae | - | - | - | - | - | - | - | - | - | 3 | - | - | - | - | - |  | - | - | - | 2 | - | - | - |  | - | - | - | - | 2 | - |  | **7** |
| Lysianassoidea | 44 | - | - | - | - | 2 | 3 | - | - | 11 | 1 | 14 | - | - | - |  | 164 | 2 | 1 | 8 | 1 | 1 | 30 |  | 2 | 16 | 6 | - | - | 3 |  | **309** |
| Stegocephalidae | - | - | - | - | - | - | - | - | - | - | - | 1 | - | - | - |  | 2 | - | - | - | - | - | 7 |  | - | - | 2 | - | - | - |  | **12** |
| Tryphosinidae | - | - | - | - | - | - | - | - | - | - | - | - | - | - | - |  | - | - | - | 1 | - | - | - |  | - | - | - | - | - | - |  | **1** |
| Uristidae | - | - | - | - | - | - | - | - | - | - | - | 2 | - | - | - |  | 2 | - | - | 1 | - | - | - |  | - | - | - | - | - | - |  | **5** |
| Ampeliscidae | 1 | - | - | - | - | - | - | - | - | - | - | - | - | - | - |  | 25 | - | - | - | - | - | - |  | - | - | 2 | - | 2 | - |  | **30** |
| Argissidae | - | - | - | - | - | - | - | - | - | - | - | - | - | - | - |  | 1 | - | - | - | - | - | - |  | - | - | - | - | - | - |  | **1** |
| Atylidae | - | - | - | - | - | - | - | - | - | - | - | - | - | - | - |  | 3 | - | - | 9 | 1 | - | 2 |  | - | - | 1 | - | - | - |  | **16** |
| Dexaminidae | - | - | - | - | - | - | - | - | - | - | - | - | - | - | - |  | - | - | - | 1 | - | - | - |  | - | - | - | - | - | - |  | **1** |
| Pardaliscidae | - | - | - | - | - | - | - | - | - | - | - | - | - | - | - |  | - | - | - | - | - | - | 3 |  | - | - | - | - | - | 1 |  | **4** |
| **Hyperiidea** | - | 1 | - | - | - | - | - | - | - | - | - | - | - | - | - |  | - | - | - | - | - | - | - |  | - | - | - | - | - | - |  | **1** |
| **Senticaudata** |  |  |  | - | - |  |  |  |  |  |  |  |  |  |  |  |  |  |  |  |  |  |  |  |  |  |  |  |  |  |  |  |
| Caprellidae | 4 | - | - | - | - | - | - | - | - | 3 | - | - | - | - | - |  | - | - | - | - | - | - | - |  | - | - | - | - | - | - |  | **7** |
| Dulichiidae | - | - | - | - | - | - | - | - | - | - | - | - | - | - | - |  | 5 | - | - | 2 | - | - | - |  | - | - | - | - | - | - |  | **7** |
| Ischyroceridae | - | - | - | - | - | - | - | - | - | 6 | - | - | - | - | - |  | - | - | - | - | - | - | - |  | - | - | - | - | - | - |  | **6** |
| Podoceridae | 2 | - | - | - | - | - | - | - | - | - | - | - | - | - | - |  | 1 | - | - | - | - | - | 4 |  | - | - | - | - | - | - |  | **7** |
| Ampithoidae | - | - | - | - | - | - | 1 | - | - | - | - | - | - | - | - |  | - | - | - | - | - | - | - |  | - | - | - | - | - | - |  | **1** |
| Aoridae | - | - | - | - | - | - | - | - | - | - | - | - | - | - | - |  | - | - | - | - | - | - | - |  | - | 1 | 1 | - | - | - |  | **2** |
| Corophiidae | - | - | - | - | - | - | - | - | - | - | - | - | - | - | - |  | - | - | - | - | - | - | - |  | - | - | - | - | 1 | - |  | **1** |
| Corophioidea | - | - | - | - | - | - | - | - | - | - | - | - | - | - | - |  | 6 | - | - | - | - | - | - |  | - | 8 | 1 | - | - | - |  | **15** |
| Corophiida | - | - | - | - | - | - | - | - | - | - | - | 1 | - | - | - |  | - | - | - | 1 | - | - | - |  | - | 4 | - | - | 1 | - |  | **7** |
| Calliopiidae | - | - | 16 | - | - | 1 | 1 | - | - | - | - | - | - | - | - |  | 1 | 1 | - | - | - | - | - |  | - | - | - | - | - | - |  | **20** |
| Maeridae | - | - | - | - | - | - | - | - | - | - | - | - | - | - | - |  | 1 | - | - | - | - | - | - |  | - | - | - | - | - | - |  | **1** |
| **Amphipoda undetermined** | - | - | - | 81 | 20 | 5 | 15 | - | 2 | 15 | 280 | 24 | - | 1 | 1 |  | 1031 | 3 | - | - | - | 1 | 7 |  | - | 3 | - | 23 | 7 | - |  | **1519** |
| Total | 87 | 64 | 26 | 81 | 20 | 11 | 23 | 6 | 23 | 43 | 281 | 46 | 23 | 1 | 5 |  | 1299 | 8 | 2 | 29 | 2 | 3 | 101 |  | 2 | 33 | 15 | 23 | 16 | 5 |  | 2278 |
